# Supplementary material
Source: ML conference proceedings conference paper supplement (https://proceedings.neurips.cc/paper_files/paper/2023/hash/c3909e3abe8ebdb20c42a42ce0bc907d-Abstract.html)
Supplement: Supplementary file 1 [file c3909e3abe8ebdb20c42a42ce0bc907d-Supplemental-Conference.zip]

Archive with 1 entries (1 files):
- simple_sequence_priors-appendix.pdf
